# Supplementary material for: Allium ducissae (A. subgen. Polyprason, Amaryllidaceae) a New Species from the Central Apennines (Italy)
Source: MDPI journal article supplement (doi:10.3390/plants11030426), 2022-02-04
Supplement: s1 [file s1]

**Article:** *Allium ducissae* (A. subgen. *Polyprason*, Amaryllidaceae) a new species from central Apennines (Italy)

**Authors:** Fabrizio Bartolucci, Marco Iocchi, Olga De Castro and Fabio Conti

**Supplementary File.**

| <b>Table S1.</b> List of <i>Allium</i> taxa used for the phylogenetic analyses (taxon, herbarium code, origin, GenBank accession, and reference). |         |                                             |                   |                                             |                                                             |                                    |      |
|---------------------------------------------------------------------------------------------------------------------------------------------------|---------|---------------------------------------------|-------------------|---------------------------------------------|-------------------------------------------------------------|------------------------------------|------|
| Taxon                                                                                                                                             | Code    | Origin                                      | GenBank accession |                                             |                                                             |                                    | Ref. |
|                                                                                                                                                   |         |                                             | ITS               | <i>trnQ</i> <sup>(UUG)</sup> - <i>rps16</i> | <i>trnL</i> <sup>(UAA)</sup> - <i>trnF</i> <sup>(GAA)</sup> | <i>rpL32-trnL</i> <sup>(UAG)</sup> |      |
| <i>Allium austrodanubiense</i><br>N.Friesen & Seregin                                                                                             | GL-107  | Bulgaria: Black Sea Coast, Kaliakra Reserve | HG794212          | n.d.                                        | n.d.                                                        | n.d.                               | 1    |
| <i>A. austrodanubiense</i>                                                                                                                        | GL-109  | Bulgaria: Konjavsko Mt, Smudertsi           | HG794214          | n.d.                                        | n.d.                                                        | n.d.                               | 1    |
| <i>A. carolinianum</i> DC.                                                                                                                        | Tax2570 | Tajikistan: Anzob Pass                      | AM418362          | LR700292                                    | LR700307                                                    | LR700264                           | 2    |
| <i>A. carolinianum</i>                                                                                                                            | Am463   | Mongolia: Dzungarian Gobi, Baytag Bogd      | MW208993          | MW201154                                    | n.d.                                                        | MW201106                           | 2    |
| <i>A. carolinianum</i>                                                                                                                            | Am1089  | Kazakhstan: Koyandytau, Tamschi             | MW208997          | MW201155                                    | n.d.                                                        | MW201105                           | 2    |
| <i>A. chrysanthum</i> Regel                                                                                                                       | n.d.    | China                                       | MH383259          | n.d.                                        | n.d.                                                        | n.d.                               | 3    |
| <i>A. chrysanthum</i>                                                                                                                             | n.d.    | China: Huzhu, Xining                        | GQ181066          | n.d.                                        | n.d.                                                        | n.d.                               | 4    |
| <i>A. chrysanthum</i>                                                                                                                             | n.d.    | n.d.                                        | n.d.              | MH992108                                    | MH992108                                                    | MH992108                           | 5    |
| <i>A. chrysocephalum</i> Regel                                                                                                                    | Am911   | China: Gansu                                | LR700277          | LR700290                                    | LR700305                                                    | LR700262                           | 6    |
| <i>A. chrysocephalum</i>                                                                                                                          | n.d.    | n.d.                                        | MH066484          | n.d.                                        | n.d.                                                        | n.d.                               | 7    |
| <i>A. chrysocephalum</i>                                                                                                                          | n.d.    | n.d.                                        | n.d.              | MH992109                                    | MH992109                                                    | MH992109                           | 5    |
| <i>A. cyathophorum</i> Bureau & Franch.                                                                                                           | n.d.    | n.d.                                        | GU565924          | n.d.                                        | n.d.                                                        | n.d.                               | 8    |
| <i>A. cyathophorum</i>                                                                                                                            | n.d.    | China: Mangkang, Tibet                      | n.d.              | MK820611                                    | MK820611                                                    | MK820611                           | 9    |
| <i>A. daghestanicum</i> Grossh.                                                                                                                   | Am938   | Russia: Daghestan, Danuch                   | LR700270          | LR700283                                    | LR700298                                                    | LR700255                           | 6    |

|                                                    |          |                                       |          |          |          |          |      |
|----------------------------------------------------|----------|---------------------------------------|----------|----------|----------|----------|------|
| <i>A. daghestanicum</i>                            | Am860    | Russia: Daghestan,<br>Shamilsky       | LR700268 | LR700281 | LR700296 | LR700253 | 6    |
| <i>A. ducissae</i> Bartolucci,<br>Iocchi & F.Conti | APP66113 | Italy: Morrore Mt.                    | OM030255 | OM032824 | OM032832 | OM055643 | t.s. |
| <i>A. ducissae</i>                                 | APP66059 | Italy: Velino Mt.                     | OM030256 | OM032825 | OM032833 | OM055644 | t.s. |
| <i>A. ducissae</i>                                 | APP66066 | Italy: Orsello Mt.                    | OM030257 | OM032826 | OM032834 | n.d.     | t.s. |
| <i>A. ducissae</i>                                 | APP35345 | Italy: Murolungo                      | OM030258 | OM032827 | OM032835 | n.d.     | t.s. |
| <i>A. gunibicum</i> Miscz. ex<br>Grossh.           | Am503    | Russia: Daghestan,<br>Avgali          | LR700265 | LR700278 | LR700293 | LR700250 | 6    |
| <i>A. gunibicum</i>                                | Am504    | Russia: Daghestan,<br>Verchnij Gunib  | LR700266 | LR700279 | LR700294 | LR700251 | 6    |
| <i>A. herderianum</i> Regel                        | 0701i    |                                       | MH383261 | n.d.     | n.d.     | n.d.     | 3    |
| <i>A. herderianum</i>                              | n.d.     | China: LianHuaShan,<br>KangLe, GanSu  | MN866561 | n.d.     | n.d.     | n.d.     | 10   |
| <i>A. herderianum</i>                              | n.d.     | China: Kangle, Gansu                  | n.d.     | MH992110 | MH992110 | MH992110 | 5    |
| <i>A. horvatii</i> Lovric                          | AM-433   | Italy: Monte Autore                   | HG794226 | n.d.     | n.d.     | n.d.     | 1    |
| <i>A. horvatii</i>                                 | GL-89    | Montenegro: Orjen Mt.                 | HG794198 | MW201148 | HG794050 | HG794120 | 1    |
| <i>A. hymenorhizum</i> Ledeb.                      | Tax 3135 | Tajikistan: Saravshan                 | AJ411879 | LR700291 | LR700306 | LR700263 | 6    |
| <i>A. hymenorhizum</i>                             | Am1100   | Kazakhstan: Region Ile<br>Alatau      | MW209000 | MW201158 | n.d.     | MW201109 | 2    |
| <i>A. hymenorhizum</i>                             | n.d.     | Kyrgyzstan: Alaiskij<br>Chrebet       | FM945429 | n.d.     | n.d.     | n.d.     | 11   |
| <i>A. maowenense</i> J.M.Xu                        | n.d.     | China: ShuiXiCun,<br>MaoXian, SiChuan | MN866562 | n.d.     | n.d.     | n.d.     | 10   |
| <i>A. maowenense</i>                               | 2601i    | n.d.                                  | MH383265 | n.d.     | n.d.     | n.d.     | 3    |
| <i>A. maowenense</i>                               | n.d.     | China: Mao County,<br>Sichuan         | ----     | MH992111 | MH992111 | MH992111 | 5    |
| <i>A. matinae</i> N.Friesen &<br>M.Abbasi          | Am1009   | Iran: Azarbaiyan-W                    | LR700271 | LR700284 | LR700299 | LR700256 | 6    |
| <i>A. obliquum</i> L.                              | O-6      | Russia: BG<br>Ekaterinenburg          | HG794228 | n.d.     | n.d.     | n.d.     | 6    |

|                                                                            |            |                                                  |          |          |          |          |      |
|----------------------------------------------------------------------------|------------|--------------------------------------------------|----------|----------|----------|----------|------|
| <i>A. obliquum</i>                                                         | O-37       | Russia: Bashkortostan, Kraka Range               | HG794230 | n.d.     | n.d.     | n.d.     | 1    |
| <i>A. ochroleucum</i> W. & K.*                                             | Am540      | Slovenia: Caven                                  | LR700272 | LR700285 | LR700300 | LR700257 | 6    |
| <i>A. ochroleucum</i> *                                                    | Am542      | Slovenia: Nanos                                  | LR700273 | LR700286 | LR700301 | LR700258 | 6    |
| <i>A. palentinum</i> Losa & P.Monts.                                       | MA532503   | Spain: Velilla del Rio Carrion                   | OM030259 | OM032828 | OM032836 | OM055645 | t.s. |
| <i>A. palentinum</i>                                                       | MA778505   | Spain: Palencia, ladera N del Espigüete          | OM030260 | OM032829 | OM032837 | OM055646 | t.s. |
| <i>A. palentinum</i>                                                       | MA515202   | Spain: Pico Espigüete, Velilla del Río Carrión   | OM030261 | OM032830 | OM032838 | n.d.     | t.s. |
| <i>A. palentinum</i>                                                       | SALA136402 | Spain: León, Maraña, valle de Valverde           | OM030262 | OM032831 | OM032839 | n.d.     | t.s. |
| <i>A. platyspathum</i> Schrenk                                             | Tax2905    | Kazakhstan: Almaty, Bolschaja Almaatinka         | AJ411878 | MW201150 | n.d.     | MW201101 | 6    |
| <i>A. platyspathum</i>                                                     | Am1104     | Kazakhstan: Toksanbai Range                      | MW208988 | MW201151 | n.d.     | MW201102 | 6    |
| <i>A. platyspathum</i> subsp. <i>amblyophyllum</i> (Kar. & Kir.) N.Friesen | Am903      | Kazakhstan: Kungei Alatau, Fluss Kurmerty        | MW208990 | MW201152 | n.d.     | MW201103 | 6    |
| <i>A. platyspathum</i> subsp. <i>amblyophyllum</i>                         | Am1103     | Kazakhstan: Kajandytau, Tamshi valey             | MW208992 | MW201153 | n.d.     | MW201104 | 6    |
| <i>A. rubriflorum</i> (Adamovic) Anackov, N.Friesen & Seregin              | GL-87      | Serbia: East Serbia, Niš, Sićevo Gorge           | HG794196 | n.d.     | n.d.     | n.d.     | 1    |
| <i>A. rubriflorum</i>                                                      | GL-88      | Serbia: East Serbia, Babušnica, Koritnička Gorge | HG794197 | n.d.     | n.d.     | n.d.     | 1    |
| <i>A. rude</i> J.M.Xu                                                      | Hexj0446   | n.d.                                             | HQ690270 | n.d.     | n.d.     | n.d.     | 12   |
| <i>A. rude</i>                                                             | n.d.       | n.d.                                             | MH066485 | n.d.     | n.d.     | n.d.     | 3    |
| <i>A. rude</i>                                                             | n.d.       | China                                            | n.d.     | MH992112 | MH992112 | MH992112 | 5    |

|                                                                                                                                                                                                           |          |                                       |            |          |          |          |    |
|-----------------------------------------------------------------------------------------------------------------------------------------------------------------------------------------------------------|----------|---------------------------------------|------------|----------|----------|----------|----|
| <i>A. strictum</i> Schrad.                                                                                                                                                                                | n.d.     | China: Xinjiang, Tuoli                | GU566621   | n.d.     | n.d.     | n.d.     | 4  |
| <i>A. strictum</i>                                                                                                                                                                                        | Tax 5404 | Kazakhstan: Chu-Ili Mts., Pass Kurdai | AJ411952** | n.d.     | n.d.     | n.d.     | 13 |
| <i>A. suaveolens</i> Jacq.                                                                                                                                                                                | Am888    | Germany: Bavaria                      | LR700274   | LR700287 | LR700302 | LR700259 | 6  |
| <i>A. suaveolens</i>                                                                                                                                                                                      | Am935    | Slovenia: Ankaran                     | LR700275   | LR700288 | LR700303 | LR700260 | 6  |
| <i>A. xichuanense</i> J.M.Xu                                                                                                                                                                              | Am977    | China: Nanjiang                       | LR700276   | LR700289 | LR700304 | LR700261 | 6  |
| <i>A. xichuanense</i>                                                                                                                                                                                     | 1001i    | n.d.                                  | MH383264   | n.d.     | n.d.     | n.d.     | 3  |
| <i>A. xinlongense</i> e D.F. Xie & X.J. He                                                                                                                                                                | n.d.     | China: BanMaXian, QingHai             | MN866565   | n.d.     | n.d.     | n.d.     | 10 |
| <i>A. xinlongense</i>                                                                                                                                                                                     | n.d.     | China: DaoFuXian, SiChuan             | MN866573   | n.d.     | n.d.     | n.d.     | 10 |
| <b>Ref.</b> , reference; <b>n.d.</b> , no datum; <b>t.s.</b> , this study; *, species reported in the article as <i>A. ericetorum</i> Thore; **, incorrect GenBank accession in the literature reference. |          |                                       |            |          |          |          |    |

## References

1. Seregin, A.P.; Anackov G.; Friesen, N. 2015. Molecular and morphological revision of the *Allium saxatile* group (Amaryllidaceae): geographical isolation as the driving force of underestimated speciation. *Botanical Journal of the Linnean Society*, **2015**, 178, 67-101, doi:10.1111/boj.12269
2. Friesen, N.; Vesselova, P.; Osmonaly, B.; Sitpayeva, G.; Luferov, A.; Shmakov, A. *Allium toksanbaicum* (Amaryllidaceae), a new species from Southeast Kazakhstan. *Phytotaxa*, **2021**, 494, 251-267, doi: 10.11646/phytotaxa.494.3.1
3. GenBank database, submission by Yu, X.H. **2018**.
4. Li, Q.Q.; Zhou, S.D.; He, X.J.; Yu, Y.; Zhang, Y.C.; Wei, X.Q. Phylogeny and biogeography of *Allium* (Amaryllidaceae: Alliaceae) based on nuclear ribosomal internal transcribed spacer and chloroplast *rps16* sequences, focusing on the inclusion of species endemic to China. *Annals of Botany*, **2010**, 106, 709-733, doi:10.1093/aob/mcq177
5. GenBank database, submission by Xie, D.F. **2019**.
6. Friesen, N.; Abbasi, M.; Murtazaliev, R.; Fritsch, R.M. *Allium matinae*—a new species from northwestern Iran. *Phytotaxa*, **2020**, 433, 181-189, doi:10.11646/phytotaxa.433.3.1
7. GenBank database, submission by Xie, C.; Zhong, Y.; Guo, X.L.; He, X.J. **2018**.
8. Wu, L.L.; Cui, X.K.; Milne, R.I.; SUN, Y.S.; Liu, J.Q. Multiple autopolyploidizations and range expansion of *Allium przewalskianum* Regel. (Alliaceae) in the Qinghai-Tibetan Plateau. *Molecular Ecology*, **2010**, 19, 1691-1704, doi: 10.1111/j.1365-294X.2010.04613.x

9. Yang, X.; Xie, D.F.; Chen, J.P.; Zhou, S.D.; Yu, Y.; He, X.J. Comparative analysis of the complete chloroplast genomes in *Allium* Subgenus *Cyathophora* (Amaryllidaceae): phylogenetic relationship and adaptive evolution. *BioMed Research International*, **2020**, 2020, doi:10.1155/2020/1732586
10. Li, M.J.; Yu, H.X.; Guo, X.L.; He, X.J. Out of the Qinghai–Tibetan Plateau and rapid radiation across Eurasia for *Allium* section *Daghestanica* (Amaryllidaceae). *AoB Plants*, **2021**, 13, plab017, doi: 10.1093/aobpla/plab017
11. Fritsch, R.M.; Friesen, N. *Allium oreotadzhikorum* and *Allium vallivanhense*, two new species of *Allium* subg. *Polyprason* (Alliaceae) from the Central Asian republic Tajikistan. *Feddes Repertorium*, **2009**, 120, 3-4, 221-231, doi:10.1002/fedr.200911199
12. Li, D.Z.; Gao, L.M.; Li, H.T.; Wang, H.; Ge, X.J.; Liu, J.Q.; et al. From the cover: comparative analysis of a large dataset indicates that internal transcribed spacer (ITS) should be incorporated into the core barcode for seed plants. *Proceedings of the National Academy of Science of the United States of America*, **2011**, 108, 19641-19646, doi:10.1073/pnas.1104551108
13. Friesen, N.; Fritsch, R.M.; Blattner, F.R. Phylogeny and new infrageneric classification of *Allium* L. (Alliaceae) based on nuclear ribosomal DNA ITS sequences. *Aliso*, **2006**, 22, 372–395, doi:10.5642/aliso.20062201.31
